# Supplementary material for: How is the effectiveness of immune surveillance impacted by the spatial distribution of spreading infections?
Source: PubMed Central journal article supplement (PMC4528487; doi:10.1098/rstb.2014.0289), 2015-08-19
Supplement: rstb20140289supp1.pdf [file rstb20140289supp1.pdf]

| Agent                   | Parameter name             | Description                                                                                                                                   | Default Value                            | Units                   |
|-------------------------|----------------------------|-----------------------------------------------------------------------------------------------------------------------------------------------|------------------------------------------|-------------------------|
| CTL                     | r_ctlspeed                 | Speed of CTL (straight line speed). For the High E:T runs where the surveillance rate (k) was slow, CTL speed was reduced by a factor of ~40. | 0.125 (efficient)<br>0.003 (inefficient) | $\mu\text{m s}^{-1}$    |
|                         | r_ctlpersist               | Persistence length of CTL straight line movement (note: interrupted whenever the CTL scans a cell)                                            | 25                                       | $\mu\text{m}$           |
|                         | t_ctlscan                  | Time spent scanning cells to determine if infected                                                                                            | 5.0                                      | s                       |
|                         | t_ctlhandle                | Time spent handling an infected cell before it is lysed                                                                                       | 30                                       | min                     |
|                         | CHEMOTAXIS_PC              | Percentage chance of CTL heading towards nearest infected cell when choosing a new direction                                                  | 0.0                                      | -                       |
| Virion                  | r_vinfect <sup>§</sup>     | Chance (per second) that an infected cell will infect a susceptible cell anywhere on the grid                                                 | 1.74e-05                                 | $\text{s}^{-1}$         |
|                         | r_vspeed <sup>Ⓒ</sup>      | Virion straight line speed                                                                                                                    | 1                                        | $\mu\text{m s}^{-1}$    |
|                         | r_vinfect <sup>Ⓒ</sup>     | Infection chance of the virion on encounter with susceptible cell (100%)                                                                      | 1                                        | -                       |
|                         | r_death                    | Virion clearance rate (half life of ~4 hours)                                                                                                 | 4.63e-05                                 | $\text{s}^{-1}$         |
| Infected cells          | r_ideath                   | Infected cell death rate, mostly due to viral cytotoxicity (half life of ~1.4 days).                                                          | 5.79e-06                                 | $\text{s}^{-1}$         |
|                         | r_vproduction <sup>Ⓒ</sup> | Production rate of 'virions' from an infected cell (~1.5 virions/day)                                                                         | 1.75e-05                                 | virions $\text{s}^{-1}$ |
| (Non-)Susceptible cells | nc_spacing                 | Spacing between (non-)susceptible cells when initialising the simulator                                                                       | 0                                        | $\mu\text{m}$           |
|                         | nc_susceptiblepc           | Percentage of cells which are susceptible when initialising the simulator                                                                     | 25                                       | (%)                     |
|                         | nc_totalcount              | Total number of (non-)susceptible cells to place during simulator initialisation                                                              | 100000                                   | -                       |

**Supplementary Table 1: List of parameters and values for runs of the pathogen-host simulator.** Legend. <sup>§</sup>: for the sparse model of infection only; <sup>Ⓒ</sup>: for the cluster model of infection only.
